# Supplementary material for: Oxytocin evokes a pulsatile PGE2 release from ileum mucosa and is required for repair of intestinal epithelium after injury
Source: PubMed Central journal article supplement (PMC4498177; doi:10.1038/srep11731), 2015-07-10
Supplement: srep11731-s1.pdf [file srep11731-s1.pdf]

**Oxytocin evokes a pulsatile PGE<sub>2</sub> release from ileum mucosa and is required for repair of intestinal epithelium after injury**

Dawei Chen\*, Junhan Zhao\*, Haoyi Wang, Ning An, Yuping Zhou, Jiahui Fan, Junwen Luo, Wenlong Su, Chuanyong Liu and Jingxin Li<sup>#</sup>

1. Department of Physiology, School of Medicine, Shandong University, Jinan, 250012, People's Republic of China

\* These authors contributed equally to this work.

*#Corresponding author. Tel: +86-0531-88382395; fax: +86-0531-88382502;*

*Email: [ljingxin@sdu.edu.cn](mailto:ljingxin@sdu.edu.cn);*

*postal address: Department of Physiology, Shandong University School of Medicine. Jinan 250012, China*

## Supplemental figure 1

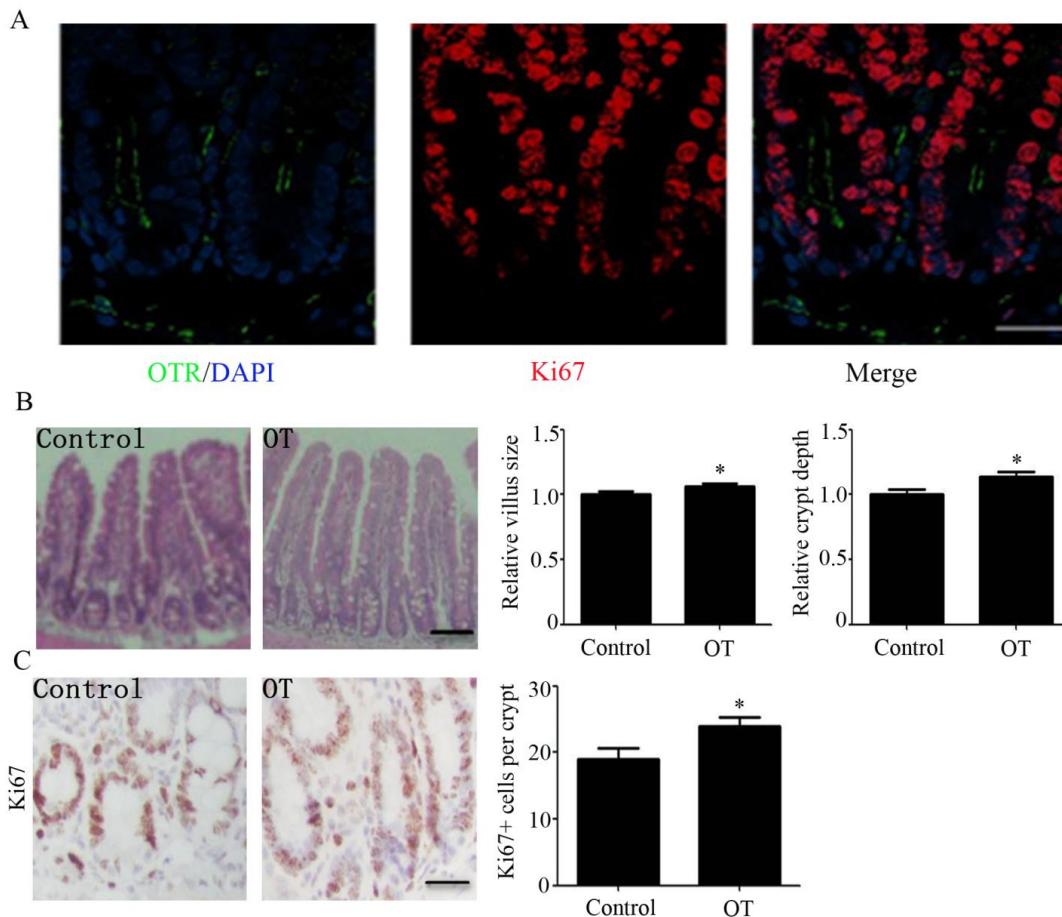

OTR expressed in TACs, and OT influence the proliferation of small intestine crypt cells

(A) Mouse ileum stained for OTR(green),Ki67(red) and DAPI (blue) shows Ki67<sup>+</sup> cells expressed OTR. Scale bar: 50  $\mu$ m

(B) Effects of exogenous OT on intestinal morphology. Ileums from mice were stained with H&E, and the relative villus sizes and crypt depth were measured and statistically analyzed. Scale bar:100  $\mu$ m

(C) OT affects the number and distribution of intestinal TACs. Ileums from mice were immunohistochemically stained for Ki67<sup>+</sup> cells. The numbers of positive cells were counted in each crypt. Scale bar:50  $\mu$ m.

Results represent 30 tissue specimens in each group (five mice per group) and the mean  $\pm$  s.d. of six tissue sections per mouse. \*,  $P < 0.05$ .

### **Video abstract**

The small intestinal crypts were isolated. After 4 hours of culture, the crypts were incubated with 2  $\mu\text{M}$  fluo-3, AM for 30 min at 37  $^{\circ}\text{C}$ , washed by Kerbs solution and observed under a Zeiss LSM780 laser scanning confocal microscope. Confocal calcium imaging reveals OT-evoked intracellular  $\text{Ca}^{2+}$  elevation and oscillations in ileum crypt cells.
